# Supplementary material for: Hydrolysis of DNA model substrates catalyzed by metal-substituted Wells–Dawson polyoxometalates
Source: Royal Society of Chemistry journal article supplement (doi:10.1039/c2dt30588g), 2012-01-01
Supplement: c2dt30588g.pdf [file c2dt30588g.pdf]

# **Hydrolysis of DNA-model substrates catalyzed by metal-substituted Wells-Dawson polyoxometalates**

Stef Vanhaecht, Gregory Absillis, Tatjana N. Parac-Vogt\*

Department of Chemistry, KU Leuven, Celestijnenlaan 200F, B-3001 Leuven, Belgium

**Supporting Information**

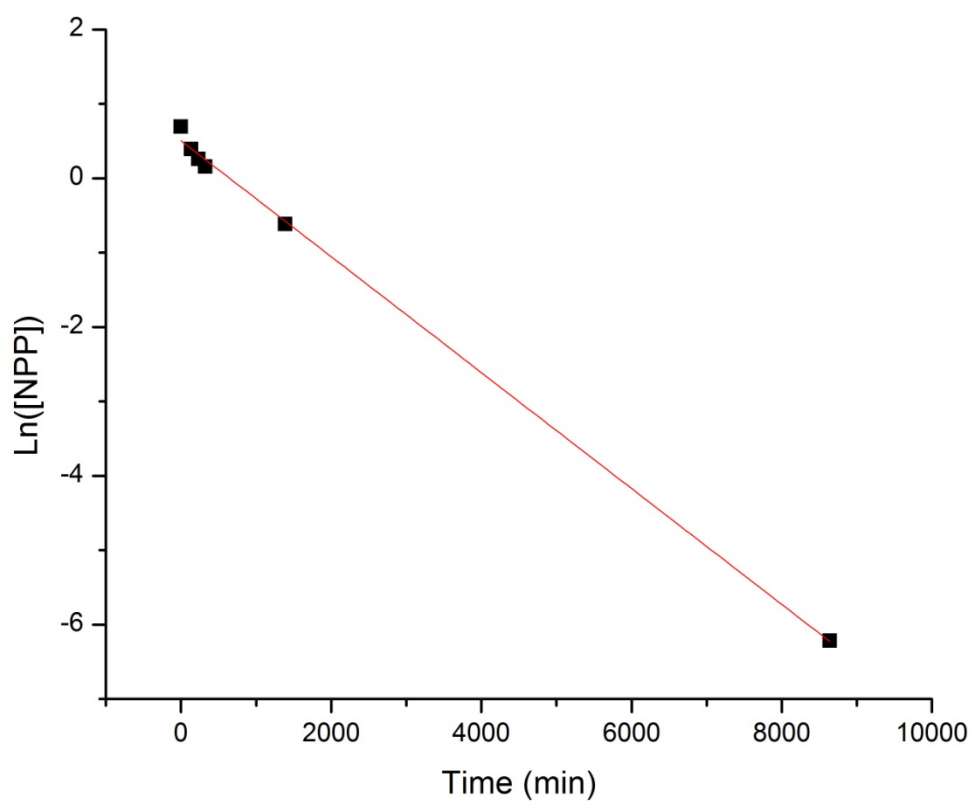

Figure S1: Natural logarithm of the concentration of NPP as a function of time of the reaction of 2.0 mM of NPP in the presence of 2.0 mM of **1** at pD 7.2. The slope of the least square fit gives the hydrolysis rate constant.

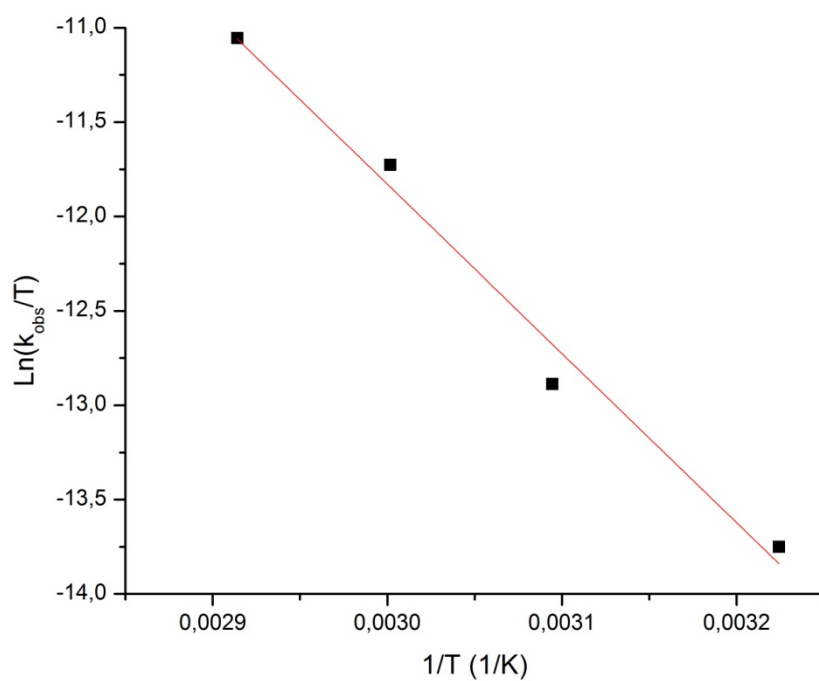

Figure S2: Eyring plot of the reaction of 2.0 mM of NPP in the presence of 2.0 mM of **1** at pD 7.2 at different reaction temperatures.

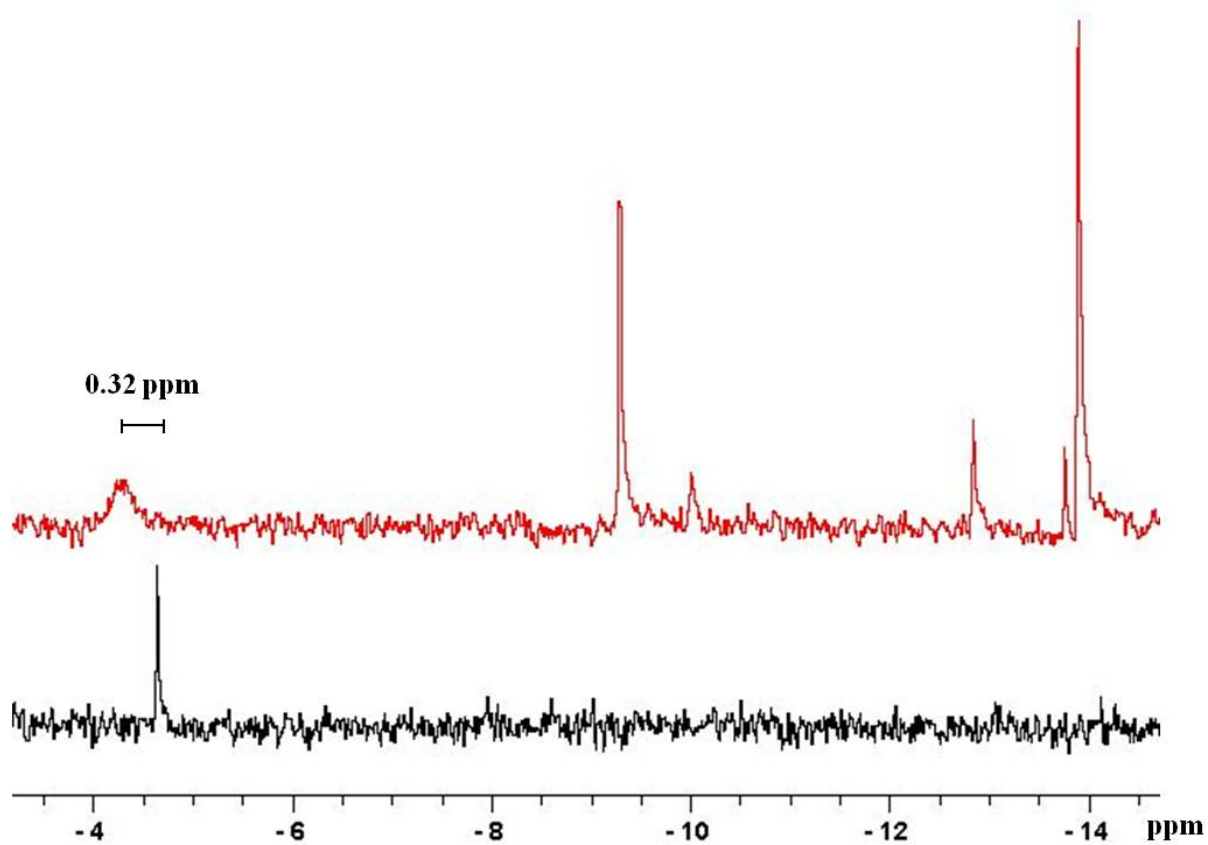

Figure S3:  $^{31}\text{P}$  NMR spectra of 2.0 mM of NPP in the absence (black) and presence (red) of 2.0 mM of **1** at pD 3.8.

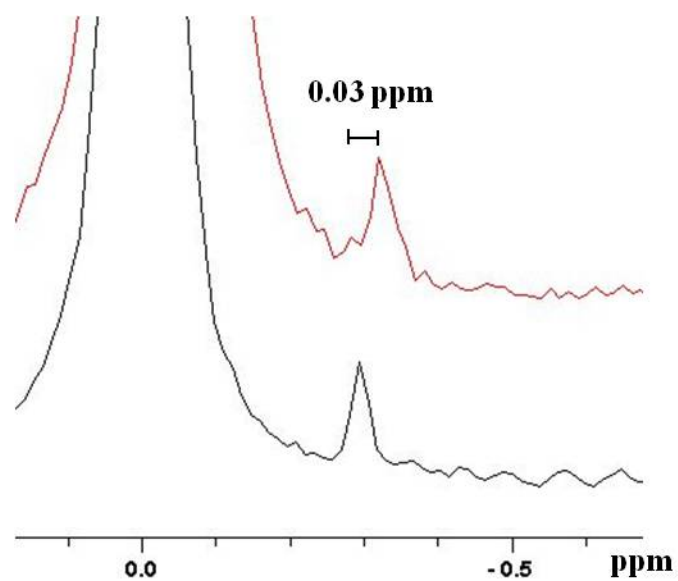

Figure S4:  $^{31}\text{P}$  NMR spectra of 2.0 mM of NPP in the absence (black) and presence (red) of 2.0 mM of **1** at pD 7.3.
